# Supplementary material
Source: PubMed Central journal article supplement (PMC3479838)
Supplement: neo1410_0926SD1.pdf [file neo1410_0926SD1.pdf]

**Table W1.** Sequences of Primers for RT-PCR.

| Gene Symbol    | Primer Sequence                | Product Size (bp) |
|----------------|--------------------------------|-------------------|
| KRT 8          |                                | 195               |
| Sense          | 5'-CCGACGAGATCAACTTCCTC-3'     |                   |
| Antisense      | 5'-GGTACATGCTCTCAGCCTCA-3'     |                   |
| KRT18          |                                | 386               |
| Sense          | 5'-AGATTGACAATGCCCGTCTT-3'     |                   |
| Antisense      | 5'-CACTGTGGTGCTCTCCCTCAA-3'    |                   |
| KRT 19         |                                | 211               |
| Sense          | 5'-TTTGAGACGGAACAGGCTCT-3'     |                   |
| Antisense      | 5'-AATCCACCTCCACACTGACC-3'     |                   |
| KRT 5          |                                | 177               |
| Sense          | 5'-TCTCGCCAGTCAAGTGTGC-3'      |                   |
| Antisense      | 5'-ATAGCCACCCACTCCACAAG-3'     |                   |
| KRT 6          |                                | 229               |
| Sense          | 5'-CACCAAGACTGTGAGGCAGA-3'     |                   |
| Antisense      | 5'-GTAGGCAGCATCCACATCCT-3'     |                   |
| KRT 14         |                                | 157               |
| Sense          | 5'-GACCATTGAGGACCTGAGGA-3'     |                   |
| Antisense      | 5'-ATTGATGTCGGCTTCCACAC-3'     |                   |
| KRT 17         |                                | 361               |
| Sense          | 5'-CACCATGACCACCTCCATC-3'      |                   |
| Antisense      | 5'-CCAGTCACGGATCTTCACCT-3'     |                   |
| EGFR           |                                | 198               |
| Sense          | 5'-GGAGCCTCTTACACCCAGTG-3'     |                   |
| Antisense      | 5'-GCTTTCGGAGATGTTGCTTC-3'     |                   |
| VIM            |                                | 323               |
| Sense          | 5'-TGCAGGACTCGGTGGACTTC-3'     |                   |
| Antisense      | 5'-GAAGCATCTCCTCCTGCAAT-3'     |                   |
| VEGF-A         |                                | 228               |
| Sense          | 5'-CACATAGGAGAGATGAGCTTC-3'    |                   |
| Antisense      | 5'-CCGCCTCGGCTTGTACAT-3'       |                   |
| VEGFR-1        |                                | 101               |
| Sense          | 5'-CTGTCATGCTAATGGTGTCCC-3'    |                   |
| Antisense      | 5'-TGCTGCTTCCTGGTCCATAAATA-3'  |                   |
| VEGFR-2        |                                | 208               |
| Sense          | 5'-GACTTCAACTGGGAATACCC-3'     |                   |
| Antisense      | 5'-CATGGACCCTGACAAATGTG-3'     |                   |
| VEGFR-3        |                                | 298               |
| Sense          | 5'-AGCCATTCATCAACAAGCCT-3'     |                   |
| Antisense      | 5'-GGCAACAGCTGGATGTCATA-3'     |                   |
| NP-1           |                                | 275               |
| Sense          | 5'-CTGGTGAGCCCTGTGGTTTATTCC-3' |                   |
| Antisense      | 5'-ACTAATGTCATCCACAGCAATCCC-3' |                   |
| NP-2           |                                | 198               |
| Sense          | 5'-CAAACACTGTGGGAACATCG-3'     |                   |
| Antisense      | 5'-TTCTCAGGAAACCCAGGAGA-3'     |                   |
| $\beta$ -Actin |                                | 276               |
| Sense          | 5'-TGGGTGAGAAGATTCCATATGT-3'   |                   |
| Antisense      | 5'-CAGCCTGGATAGCAACGTACA-3'    |                   |
